# Supplementary material for: Normalization of Enzyme Expression and Activity Regulating Vitamin A Metabolism Increases RAR-Beta Expression and Reduces Cellular Migration and Proliferation in Diseases Caused by Tuberous Sclerosis Gene Mutations
Source: PubMed Central journal article supplement (PMC8226169; doi:10.3389/fonc.2021.644592), 2021-06-11
Supplement: DataSheet_1.pdf [file DataSheet_1.pdf]

**S. Table 1.** Primer sequences

| <b>Gene name</b>      | <b>Forward primer</b>    | <b>Reverse primer</b>  |
|-----------------------|--------------------------|------------------------|
| <b><u>β-actin</u></b> | GCGCGGCTACAGCTTCA        | CTTAATGTCACGCACGATTTCC |
| <b><u>TSC1</u></b>    | CCGTGGCCCTATGCTTGTA      | CGGCTTTGCCACATATTCG    |
| <b><u>TSC2</u></b>    | CCTTGGACGGTATTGCCTGT     | GCCTGCTTCTGTGTACCACT   |
| <b><u>RARβ</u></b>    | ATCCGAGCAGGGTTTGTCTG     | TTTTCCCAGCCCCGAATCAT   |
| <b><u>ALDH1A1</u></b> | GATCCCCGTGGCGTACTATG     | TGGATCTTGTCAGCCCAACC   |
| <b><u>ADH1A</u></b>   | TCTGGGAAAAGTATCCGTACCATT | TGAAGACTGCCACAAGGGAA   |
| <b><u>ADH4</u></b>    | CTTTGGCCTAGGAGGTGTGG     | CCAGGGCTTTAGCCTTCACA   |
| <b><u>ALDH1A2</u></b> | CAAGATAGAGATGCCCGGCG     | ACAGGGAACACTCTCCCACT   |
| <b><u>ALDH1A3</u></b> | AGATACTTTGCAGGGTGGGC     | GGGGGAAGTTCATGGAGTG    |

**S. Table 2.** Metabolic enzymes activity in certain cancers and substrates involved

| <b>ALDH isozyme</b>        | <b>substrate involved</b>                                                                | <b>Tissue</b>                                                                  | <b>Cancer type</b>                | <b>References</b> |
|----------------------------|------------------------------------------------------------------------------------------|--------------------------------------------------------------------------------|-----------------------------------|-------------------|
| <b><u>ADH 1A, B, C</u></b> | Ethanol-retinol-lipid peroxidation                                                       | Liver, lung, kidneys                                                           | Oesophageal, renal, gastric       | [24][25][26]      |
| <b><u>ADH 4</u></b>        | Ethanol-retinol                                                                          | Liver, cornea                                                                  | Oesophageal, renal, gastric       | [24][25][26]      |
| <b><u>ADH 6</u></b>        | Ethanol-retinol                                                                          | Liver, stomach                                                                 | gastric                           | [24][25][26]      |
| <b><u>ALDH1A1</u></b>      | Retinal Aldophosphamide, Acetaldehyde                                                    | Liver, kidney, red blood cells, skeletal muscle, lung, breast, lens, stomach   | All cancer types                  | [27]              |
| <b><u>ALDH1A2</u></b>      | Retinal                                                                                  | Testis, liver, kidney                                                          | Prostate, Acute myeloid leukaemia | [27]              |
| <b><u>ALDH1A3</u></b>      | Retinal                                                                                  | Kidney, skeletal muscle, lung, breast, stomach, salivary glands                | Breast, bladder, prostate         | [27]              |
| <b><u>ALDH3A1</u></b>      | Long-chain aliphatic aldehydes, Lipid peroxidation derived aldehydes                     | Stomach, cornea, breast, lung, lens, oesophagus, salivary glands, skin         | Breast, lung, liver               | [23]              |
| <b><u>ALDH3B1-2</u></b>    |                                                                                          | Kidney, lung, pancreas                                                         | Breast, lung, colon               | [23]              |
| <b><u>ALDH4A1</u></b>      | Pyrroline-5-carboxylate                                                                  | Liver, kidney, heart, skeletal muscle, brain, pancreas, placenta, lung, spleen | Liver, glioblastoma               | [28]              |
| <b><u>ALDH6A1</u></b>      | Methylmalonate semialdehyde                                                              | Liver, kidney, heart, skeletal muscle                                          | Breast                            | [23]              |
| <b><u>CYP2E1</u></b>       | Catalyse the biotransformation of various compounds and enhance retinoic acid metabolism | Liver                                                                          | Liver, Breast                     | [29]              |



# S. Table 3. GeneMANIA report

# GeneMANIA report

Application version : 3.6.0

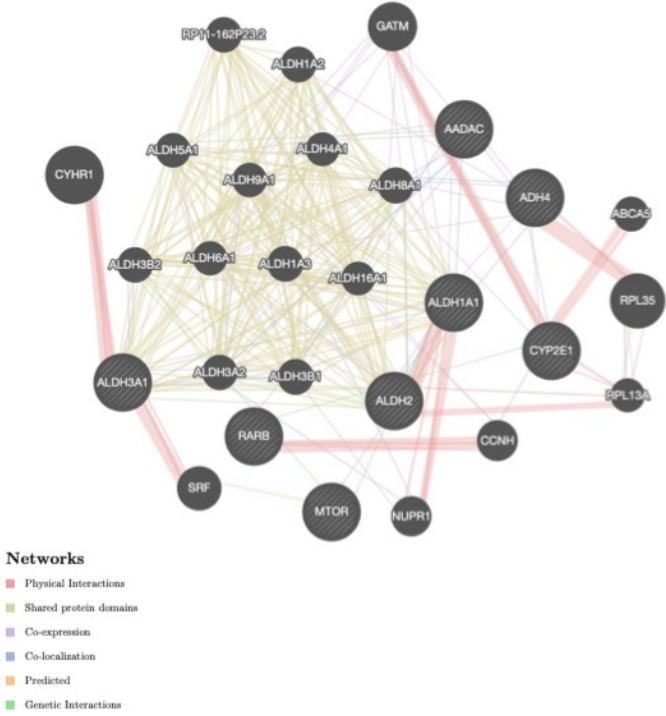

- Networks**
- Physical Interactions
  - Shared protein domains
  - Co-expression
  - Co-localization
  - Predicted
  - Genetic Interactions

1 of 9

2 of 9

3 of 9

4 of 9

| T                                                                                                                                                                                                                                                                                                                                                                                                                                                                                                    |
|------------------------------------------------------------------------------------------------------------------------------------------------------------------------------------------------------------------------------------------------------------------------------------------------------------------------------------------------------------------------------------------------------------------------------------------------------------------------------------------------------|
| Dusetti-2008 , Thompson-Luchansky-2014 , Tong-Moran-2014 , Toyoshima-Grandori-2012 , Tsai-Cristea-2012                                                                                                                                                                                                                                                                                                                                                                                               |
| U                                                                                                                                                                                                                                                                                                                                                                                                                                                                                                    |
| Udeshi-Carr-2012                                                                                                                                                                                                                                                                                                                                                                                                                                                                                     |
| V                                                                                                                                                                                                                                                                                                                                                                                                                                                                                                    |
| van Wijk-Timmers-2009 , Vandamme-Angrand-2011 , Varjosalo-Gstaiger-2013 , Varjosalo-Supert-Furga-2013 , Venkatesan-Vidal-2009 , Vermeulen-Mann-2010 , Vinayagam-Wanker-2011 , Virok-Fülöp-2011 , Vizeacoumar-Moffat-2013                                                                                                                                                                                                                                                                             |
| W                                                                                                                                                                                                                                                                                                                                                                                                                                                                                                    |
| Wagner-Choudhary-2011 , Wallach-Kramer-2013 , Wan-Emili-2015 , Wang-Balch-2006 , Wang-Cheung-2015 , Wang-He-2008 , Wang-Maris-2006 , Wang-Xu-2015 , Wang-Yang-2011 , Weimann-Stelzl-2013 A , Weimann-Stelzl-2013 B , Weinmann-Meister-2009 , Wen-Wu-2014 , Whisenant-Salomon-2015 , Wilker-Yaffe-2007 , Willingham-Muchowski-2003 , Witt-Labeit-2008 , Wong-O'Bryan-2012 , Woods-Monteiro-2012 , Woodsmith-Sanderson-2012 , Wu-Garvey-2007 , Wu-Li-2007 , Wu-Ma-2012 , Wu-Stein-2010 , Wu-Stein-2010 |
| X                                                                                                                                                                                                                                                                                                                                                                                                                                                                                                    |
| Xiao-Lefkowitz-2007 , Xie-Cong-2013 , Xie-Green-2012 , Xu-Ye-2012                                                                                                                                                                                                                                                                                                                                                                                                                                    |
| Y                                                                                                                                                                                                                                                                                                                                                                                                                                                                                                    |
| Yang-Chen-2010 , Yatim-Benkirane-2012 , Yu-Chow-2013 , Yu-Vidal-2011                                                                                                                                                                                                                                                                                                                                                                                                                                 |
| Z                                                                                                                                                                                                                                                                                                                                                                                                                                                                                                    |
| Zanon-Pichler-2013 , Zhang-Shang-2006 , Zhang-Zou-2011 , Zhao-Krug-2005 , Zhao-Yang-2011 , Zhou-Conrads-2004 , Zhou-Hanemann-2016                                                                                                                                                                                                                                                                                                                                                                    |

## Genes

| Gene          | Description                                                                          | Rank |
|---------------|--------------------------------------------------------------------------------------|------|
| AADAC         | arylacetamide deacetylase [Source:HGNC Symbol;Acc:HGNC:17]                           | N/A  |
| ADH4          | alcohol dehydrogenase 4 (class II), pi polypeptide [Source:HGNC Symbol;Acc:HGNC:252] | N/A  |
| ALDH2         | aldehyde dehydrogenase 2 family (mitochondrial) [Source:HGNC Symbol;Acc:HGNC:404]    | N/A  |
| ALDH1A1       | aldehyde dehydrogenase 1 family member A1 [Source:HGNC Symbol;Acc:HGNC:402]          | N/A  |
| RARB          | retinoic acid receptor beta [Source:HGNC Symbol;Acc:HGNC:9865]                       | N/A  |
| MTOR          | mechanistic target of rapamycin [Source:HGNC Symbol;Acc:HGNC:3942]                   | N/A  |
| ALDH3A1       | aldehyde dehydrogenase 3 family member A1 [Source:HGNC Symbol;Acc:HGNC:405]          | N/A  |
| CYP2E1        | cytochrome P450 family 2 subfamily E member 1 [Source:HGNC Symbol;Acc:HGNC:2631]     | N/A  |
| CYHR1         | cysteine and histidine rich 1 [Source:HGNC Symbol;Acc:HGNC:17806]                    | 1    |
| RPL35         | ribosomal protein L35 [Source:HGNC Symbol;Acc:HGNC:10344]                            | 2    |
| GATM          | glycine amidinotransferase [Source:HGNC Symbol;Acc:HGNC:4175]                        | 3    |
| SRF           | serum response factor [Source:HGNC Symbol;Acc:HGNC:11291]                            | 4    |
| CCNH          | cyclin H [Source:HGNC Symbol;Acc:HGNC:1594]                                          | 5    |
| NUPR1         | nuclear protein 1, transcriptional regulator [Source:HGNC Symbol;Acc:HGNC:29990]     | 6    |
| ALDH8A1       | aldehyde dehydrogenase 8 family member A1 [Source:HGNC Symbol;Acc:HGNC:15471]        | 7    |
| ALDH1A3       | aldehyde dehydrogenase 1 family member A3 [Source:HGNC Symbol;Acc:HGNC:409]          | 8    |
| ALDH3B1       | aldehyde dehydrogenase 3 family member B1 [Source:HGNC Symbol;Acc:HGNC:410]          | 9    |
| ALDH1A2       | aldehyde dehydrogenase 1 family member A2 [Source:HGNC Symbol;Acc:HGNC:15472]        | 10   |
| RP11-162P23.2 |                                                                                      | 11   |
| ALDH3B2       | aldehyde dehydrogenase 3 family member B2 [Source:HGNC Symbol;Acc:HGNC:411]          | 12   |
| ALDH3A2       | aldehyde dehydrogenase 3 family member A2 [Source:HGNC Symbol;                       | 13   |

6 of 9

## Search parameters

**Organism** Homo sapiens (human)  
**Genes** RARB , ALDH2 , AADAC , CYP2E1 , ADH4 , MTOR , ALDH3 , ALDH1  
**Network weighting** Automatically selected weighting method  
**Networks** **A**  
 Abu-Odeh-Aqeilan-2014 , Agrawal-Sedivy-2010 , Aichem-Groettrup-2012 , Albers-Koegl-2005 , Alexandru-Deshaies-2008 , Alizadeh-Staudt-2000 , Andresen-Flores-Morales-2014 , Ar buckle-Grant-2010 , Arroyo-Aloy-2014 , Arroyo-Aloy-2015

## B

Bahr-Bowler-2013 , Bailey-Hieter-2015 , Bandyopadhyay-Ideker-2010 , Bantscheff-Drewes-2011 , Barr-Knapp-2009 , Barrios-Rodiles-Wrana-2005 , Behrends-Harper-2010 , Behzadnia-Lührmann-2007 , Bennett-Harper-2010 , Benzinger-Hermeking-2005 , Berggård-James-2006 , Bett-Hay-2013 , Bhatnagar-Attie-2014 , Bild-Nevens-2006 B , BIOGRID-SMALL-SCALE-STUDIES , BIOGRID-SMALL-SCALE-STUDIES , Blandin-Richard-2013 , Blumen-Brummelkamp-2015 , Blumen-Brummelkamp-2015 , Bogachek-Weigel-2014 , Boldrick-Relman-2002 , Bonacci-Soubeyran-2014 , Bouwmeester-Supert-Furga-2004 , Brajenovic-Drewes-2004 , Brehme-Supert-Furga-2009 , Bruderer-Hay-2011 , Burington-Shaughnessy-2008 , Butland-Hayden-2014 , Byron-Humphries-2012

## C

Cai-Conaway-2007 , Camargo-Brandon-2007 , Campos-Reinberg-2015 , Cao-Chinnaiyan-2014 , Carmon-Liu-2014 , CELL\_MAP , Chen-Brown-2002 , Chen-Ge-2013 , Chen-Huang-2014 , Chen-Zhang-2013 , Christianson-Kopito-2011 , Cloutier-Coulombe-2013 , Colland-Gauthier-2004 , Corominas-Iakoucheva-2014 , Couzens-Gingras-2013 , Cox-Rizzino-2013 , Coyaud-Raught-2015

## D

Danielsen-Nielsen-2011 , Dart-Wells-2015 , de Hoog-Mann-2004 , Diner-Cristea-2015 , Dobbin-Giordano-2005 , Drissi-Boisvert-2015 , Dyer-Sobral-2010

## E

Emanuele-Elledge-2011 , Emdal-Olsen-2015 , Ewing-Figeys-2007

## F

Fenner-Frehn-2010 , Floyd-Pagliarini-2016 , Foerster-Ritter-2013 , Fogeron-Lange-2013 , Foster-Marshall-2013 , Freibaum-Taylor-2010

## G

Gabriel-Baumgrass-2016 , Galligan-Howley-2015 , Gao-Reinberg-2012 , Gautier-Hall-2009 , Giannone-Liu-2010 , Glatter-Gataiger-2009 , Gloeckner-Ueffing-2007 ,

2 of 9

| Gene     | Description                                                                    | Rank |
|----------|--------------------------------------------------------------------------------|------|
|          | Acc:HGNC:403]                                                                  |      |
| ABCA5    | ATP binding cassette subfamily A member 5 [Source:HGNC Symbol;Acc:HGNC:35]     | 14   |
| ALDH5A1  | aldehyde dehydrogenase 5 family member A1 [Source:HGNC Symbol;Acc:HGNC:408]    | 15   |
| ALDH9A1  | aldehyde dehydrogenase 9 family member A1 [Source:HGNC Symbol;Acc:HGNC:412]    | 16   |
| ALDH6A1  | aldehyde dehydrogenase 6 family member A1 [Source:HGNC Symbol;Acc:HGNC:7179]   | 17   |
| RPL13A   | ribosomal protein L13a [Source:HGNC Symbol;Acc:HGNC:10304]                     | 18   |
| ALDH16A1 | aldehyde dehydrogenase 16 family member A1 [Source:HGNC Symbol;Acc:HGNC:28114] | 19   |
| ALDH4A1  | aldehyde dehydrogenase 4 family member A1 [Source:HGNC Symbol;Acc:HGNC:406]    | 20   |

## G

Goehler-Wanker-2004 , Golebiowski-Hay-2009 , Goudreault-Gingras-2009 , Grant-2010 , Greco-Cristea-2011 , Grossmann-Stelzl-2015 , Guarani-Harper-2014 , Gupta-Pelletier-2015

## H

Hanson-Clayton-2014 , Hauri-Gstaiger-2013 , Havrylov-Redowicz-2009 , Havugimana-Emili-2012 , Hayes-Urbé-2012 , Hegele-Stelzl-2012 A , Hegele-Stelzl-2012 B , Hein-Mann-2015 , Hill-Livingston-2014 , HUMANCYC , Humphries-Humphries-2009 , Hutchins-Peters-2010 , Huttlin-Gygi-2015

## I

I2D-BIND-Fly2Human , I2D-BIND-Mouse2Human , I2D-BIND-Rat2Human , I2D-BIND-Worm2Human , I2D-BIND-Yeast2Human , I2D-BioGRID-Fly2Human , I2D-BioGRID-Mouse2Human , I2D-BioGRID-Rat2Human , I2D-BioGRID-Worm2Human , I2D-BioGRID-Yeast2Human , I2D-Chen-Pawson-2009-PiwiScreen-Mouse2Human , I2D-Formstecher-Daviet-2005-Embryo-Fly2Human , I2D-Giot-Rothbert-2003-Low-Fly2Human , I2D-INNAEDB-Mouse2Human , I2D-IntAct-Fly2Human , I2D-IntAct-Mouse2Human , I2D-IntAct-Rat2Human , I2D-IntAct-Worm2Human , I2D-IntAct-Yeast2Human , I2D-Krogan-Greenblatt-2006-Core-Yeast2Human , I2D-Krogan-Greenblatt-2006-NonCore-Yeast2Human , I2D-Li-Vidal-2004-CORE-1-Worm2Human , I2D-Li-Vidal-2004-non-core-Worm2Human , I2D-Manual-Mouse2Human , I2D-Manual-Rat2Human , I2D-MGI-Mouse2Human , I2D-MINT-Fly2Human , I2D-MINT-Mouse2Human , I2D-MINT-Rat2Human , I2D-MINT-Worm2Human , I2D-MINT-Yeast2Human , I2D-Ptacek-Snyder-2005-Yeast2Human , I2D-Tarassov-PCA-Yeast2Human , I2D-Tewari-Vidal-2004-TGFB-Worm2Human , I2D-vonMering-Bork-2002-High-Yeast2Human , I2D-vonMering-Bork-2002-Low-Yeast2Human , I2D-vonMering-Bork-2002-Medium-Yeast2Human , I2D-Wang-Orkin-2006-ESemplx-Mouse2Human , I2D-Wang-Orkin-2006-ESemplxlow-Mouse2Human , I2D-Yu-Vidal-2008-GoldStd-Yeast2Human , IMID , Ingham-Pawson-2005 , Innocenti-Brown-2011 , INTERPRO , IREF-BIND , IREF-BIOGRID , IREF-DIP , IREF-HPRD , IREF-INTACT , IREF-MATRIXDB , IREF-MPPI , IREF-PUBMED , IREF-SMALL-SCALE-STUDIES , IREF-SMALL-SCALE-STUDIES

## J

Jeronimo-Coulombe-2007 , Jin-Pawson-2004 , Johnson-Kerner-Wichterle-2015 , Johnson-Shoemaker-2003 , Jones-MacBeath-2006 , Joshi-Cristea-2013 , Jäger-Krogan-2011

## K

Kahle-Zoghbi-2011 , Kaltenbach-Hughes-2007 , Katsogiannou-Rocchi-2014 , Kim-Gygi-2011 , Kim-Major-2015 , Kneissl-Grummt-2003 , Koch-Hermeking-2007 , Kotlyar-Juriscica-2015 , Kristensen-Foster-2012 , Kärblane-Sarmiento-2015 , Kiril-Görlich-2015

## Networks

|                                                                                                                                                                         |        |
|-------------------------------------------------------------------------------------------------------------------------------------------------------------------------|--------|
| <b>Physical Interactions</b>                                                                                                                                            | 35.06% |
| Wang-Yang-2011                                                                                                                                                          | 20.41% |
| Toward an understanding of the protein interaction network of the human liver. Wang et al (2011). <i>Mol Syst Biol</i>                                                  |        |
| Physical Interactions with 3,408 interactions from BioGRID                                                                                                              |        |
| IREF-BIOGRID                                                                                                                                                            | 7.76%  |
| Physical Interactions with 155,470 interactions from iRefIndex                                                                                                          |        |
| IREF-INTACT                                                                                                                                                             | 6.89%  |
| Physical Interactions with 56,297 interactions from iRefIndex                                                                                                           |        |
| <b>Shared protein domains</b>                                                                                                                                           | 32.85% |
| INTERPRO                                                                                                                                                                | 20.04% |
| Shared protein domains with 608,863 interactions from InterPro                                                                                                          |        |
| PFAM                                                                                                                                                                    | 12.80% |
| Shared protein domains with 457,054 interactions from Pfam                                                                                                              |        |
| <b>Co-expression</b>                                                                                                                                                    | 23.82% |
| Mallon-McKay-2013                                                                                                                                                       | 5.48%  |
| StemCellDB: the human pluripotent stem cell database at the National Institutes of Health. Mallon et al (2013). <i>Stem Cell Res</i>                                    |        |
| Co-expression with 585,265 interactions from GEO                                                                                                                        |        |
| Wu-Garvey-2007                                                                                                                                                          | 5.41%  |
| The effect of insulin on expression of genes and biochemical pathways in human skeletal muscle. Wu et al (2007). <i>Endocrine</i>                                       |        |
| Co-expression with 267,109 interactions from GEO                                                                                                                        |        |
| Perou-Botstein-2000                                                                                                                                                     | 4.61%  |
| Molecular portraits of human breast tumours. Perou et al (2000). <i>Nature</i>                                                                                          |        |
| Co-expression with 185,068 interactions from supplementary material                                                                                                     |        |
| Innocenti-Brown-2011                                                                                                                                                    | 3.48%  |
| Identification, replication, and functional fine-mapping of expression quantitative trait loci in primary human liver tissue. Innocenti et al (2011). <i>PLoS Genet</i> |        |
| Co-expression with 603,765 interactions from GEO                                                                                                                        |        |
| Bahr-Bowler-2013                                                                                                                                                        | 3.35%  |
| Peripheral blood mononuclear cell gene expression in chronic obstructive pulmonary disease. Bahr et al (2013). <i>Am J Respir Cell Mol Biol</i>                         |        |
| Co-expression with 274,849 interactions from GEO                                                                                                                        |        |
| Chen-Brown-2002                                                                                                                                                         | 0.84%  |
| Gene expression patterns in human liver cancers. Chen et al (2002). <i>Mol Biol Cell</i>                                                                                |        |
| Co-expression with 292,241 interactions from supplementary material                                                                                                     |        |
| Dobbin-Giordano-2005                                                                                                                                                    | 0.65%  |
| Interlaboratory comparability study of cancer gene expression analysis using oligonucleotide microarrays. Dobbin et al (2005). <i>Clin Cancer Res</i>                   |        |

8 of 9

## L

Lambert-Gingras-2015 , Lamoliatte-Thibault-2014 , Lau-Ronal-2012 , Lee-Songyang-2011 , Lehner-Sanderson-2004 A , Lehner-Sanderson-2004 B , Leng-Wang-2014 , Leung-Jones-2014 , Li-Chen-2015 , Li-Dorf-2011 A , Li-Dorf-2011 B , Li-Dorf-2014 , Li-Haura-2013 , Lim-Zoghbi-2006 , Lin-Smith-2010 , Lipp-Guthrie-2015 , Liu-Wang-2012 , Lières-Lamond-2010 , Loch-Strickler-2012 , Low-Heck-2014 , Lu-Zhang-2013 , Luo-Elledge-2009

## M

Mak-Moffat-2010 , Mallon-McKay-2013 , Malvonnaya-Qin-2010 , Markson-Sanderson-2009 , Maréchal-Zou-2014 , Matsumoto-Nakayama-2005 , McCracken-Blenchowe-2005 , McFarland-Nussbaum-2008 , Meek-Piwonica-Worms-2004 , Milev-Moulard-2012 , Miyamoto-Sato-Yanagawa-2010 , Murakawa-Landthaler-2015

## N

Nakayama-Ohara-2002 , Nakayasu-Adkins-2013 , Napolitano-Meroni-2011 , Narayan-Bennett-2012 , Nathan-Goldberg-2013 , NCI\_NATURE , Neganova-Lako-2011 , Newman-Keating-2003 , Nicholson-Hupp-2014 , Noble-Diehl-2008

## O

Oliviero-Cagney-2015 , Olma-Pintard-2009 , Oláh-Ovádi-2011 , Oshikawa-Nakayama-2012 , Ouyang-Gill-2009

## P

Panigrahi-Pati-2012 , Papp-Lamia-2015 , Perez-Hernandez-Yáñez-M6-2013 , Perou-Botstein-1999 , Perou-Botstein-2000 , Persaud-Rotin-2009 , Petschnigg-Staglar-2014 , PFAM , Phillips-Corn-2013 , Pichlmair-Supert-Furga-2011 , Pichlmair-Supert-Furga-2012 , Pilot-Storck-Goillot-2010 , Povlsen-Choudhary-2012

## R

Ramachandran-LaBaer-2004 , Raman-Harper-2015 , Ramaswamy-Golub-2001 , Ravasi-Hayashizaki-2010 , REACTOME , Reinke-Keating-2013 , Reyniers-Taymans-2014 , Richter-Chrzanoska-Lightowlers-2010 , Rieger-Chu-2004 , Rolland-Vidal-2014 , Rosenwald-Staudt-2001 , Roth-Zlotnik-2006 , Roux-Burke-2012 , Rowbotham-Mermoud-2011 , Roy-Pardo-2014 , Roy-Parent-2013 , Rual-Vidal-2005 A , Rual-Vidal-2005 B

## S

Sang-Jackson-2011 , Sato-Conaway-2004 , Schadt-Shoemaker-2004 , Scholz-Taylor-2016 , Singh-Moore-2012 , Smirnov-Cheung-2009 , So-Colwill-2015 , Soler-López-Aloy-2011 , Sowa-Harper-2009 , Stehling-Lill-2012 , Stehling-Lill-2013 , Stelzl-Wanker-2005 , Stes-Gevaert-2014 , Stuart-Kim-2003 , Suter-Wanker-2013

## T

Taipale-Lindquist-2012 , Taipale-Lindquist-2014 , Takahashi-Conaway-2011 , Tarallo-Weisz-2011 , Tatham-Hay-2011 , Teixeira-Gomes-2010 , Thalappilly-

|                                                                                                                                                        |        |
|--------------------------------------------------------------------------------------------------------------------------------------------------------|--------|
| <b>Co-expression</b>                                                                                                                                   | 23.82% |
| Dobbin-Giordano-2005                                                                                                                                   |        |
| Co-expression with 444,931 interactions from GEO                                                                                                       |        |
| <b>Co-localization</b>                                                                                                                                 | 5.19%  |
| Schadt-Shoemaker-2004                                                                                                                                  | 3.86%  |
| A comprehensive transcript index of the human genome generated using microarrays and computational approaches. Schadt et al (2004). <i>Genome Biol</i> |        |
| Co-localization with 60,126 interactions from GEO                                                                                                      |        |
| Johnson-Shoemaker-2003                                                                                                                                 | 1.33%  |
| Genome-wide survey of human alternative pre-mRNA splicing with exon junction microarrays. Johnson et al (2003). <i>Science</i>                         |        |
| Co-localization with 426,332 interactions from GEO                                                                                                     |        |
| <b>Predicted</b>                                                                                                                                       | 2.33%  |
| Stuart-Kim-2003                                                                                                                                        | 2.33%  |
| A gene-coexpression network for global discovery of conserved genetic modules. Stuart et al (2003). <i>Science</i>                                     |        |
| Predicted with 24,872 interactions from supplementary material                                                                                         |        |
| <b>Genetic Interactions</b>                                                                                                                            | 0.76%  |
| Lin-Smith-2010                                                                                                                                         | 0.76%  |
| A genome-wide map of human genetic interactions inferred from radiation hybrid genotypes. Lin et al (2010). <i>Genome Res</i>                          |        |
| Genetic Interactions with 4,820,370 interactions from supplementary material                                                                           |        |

9 of 9

5 of 9

7 of 9



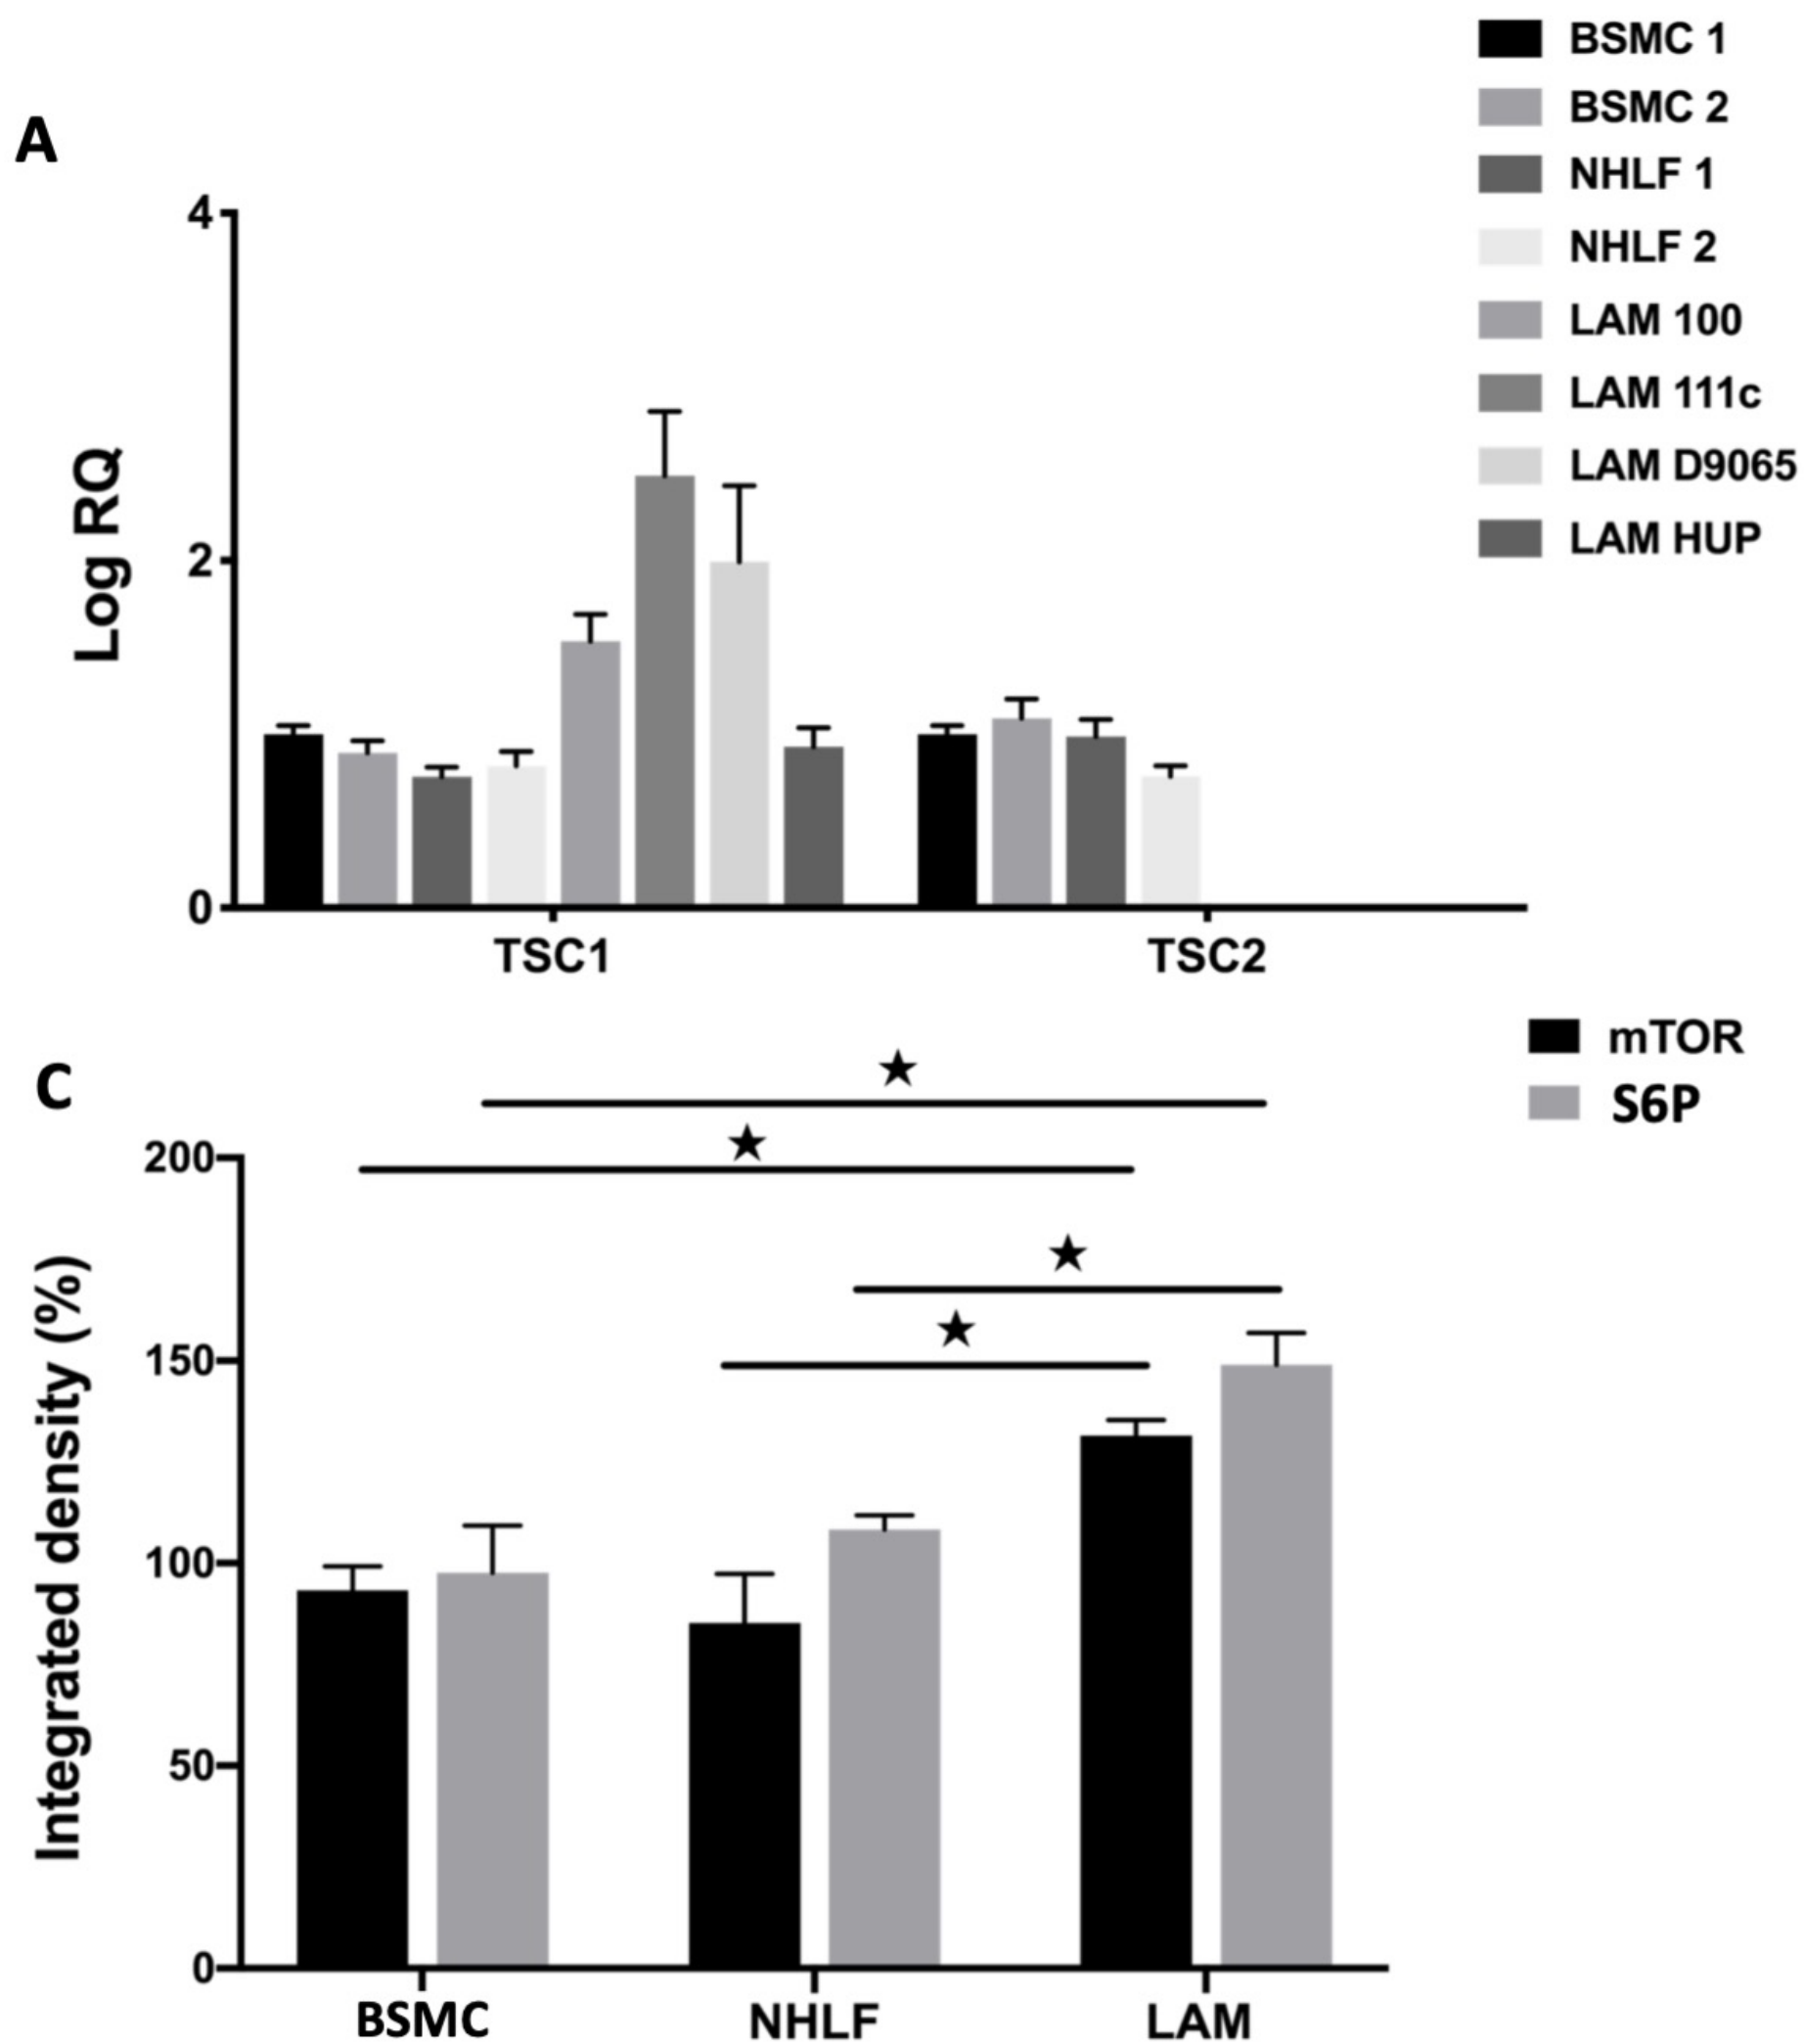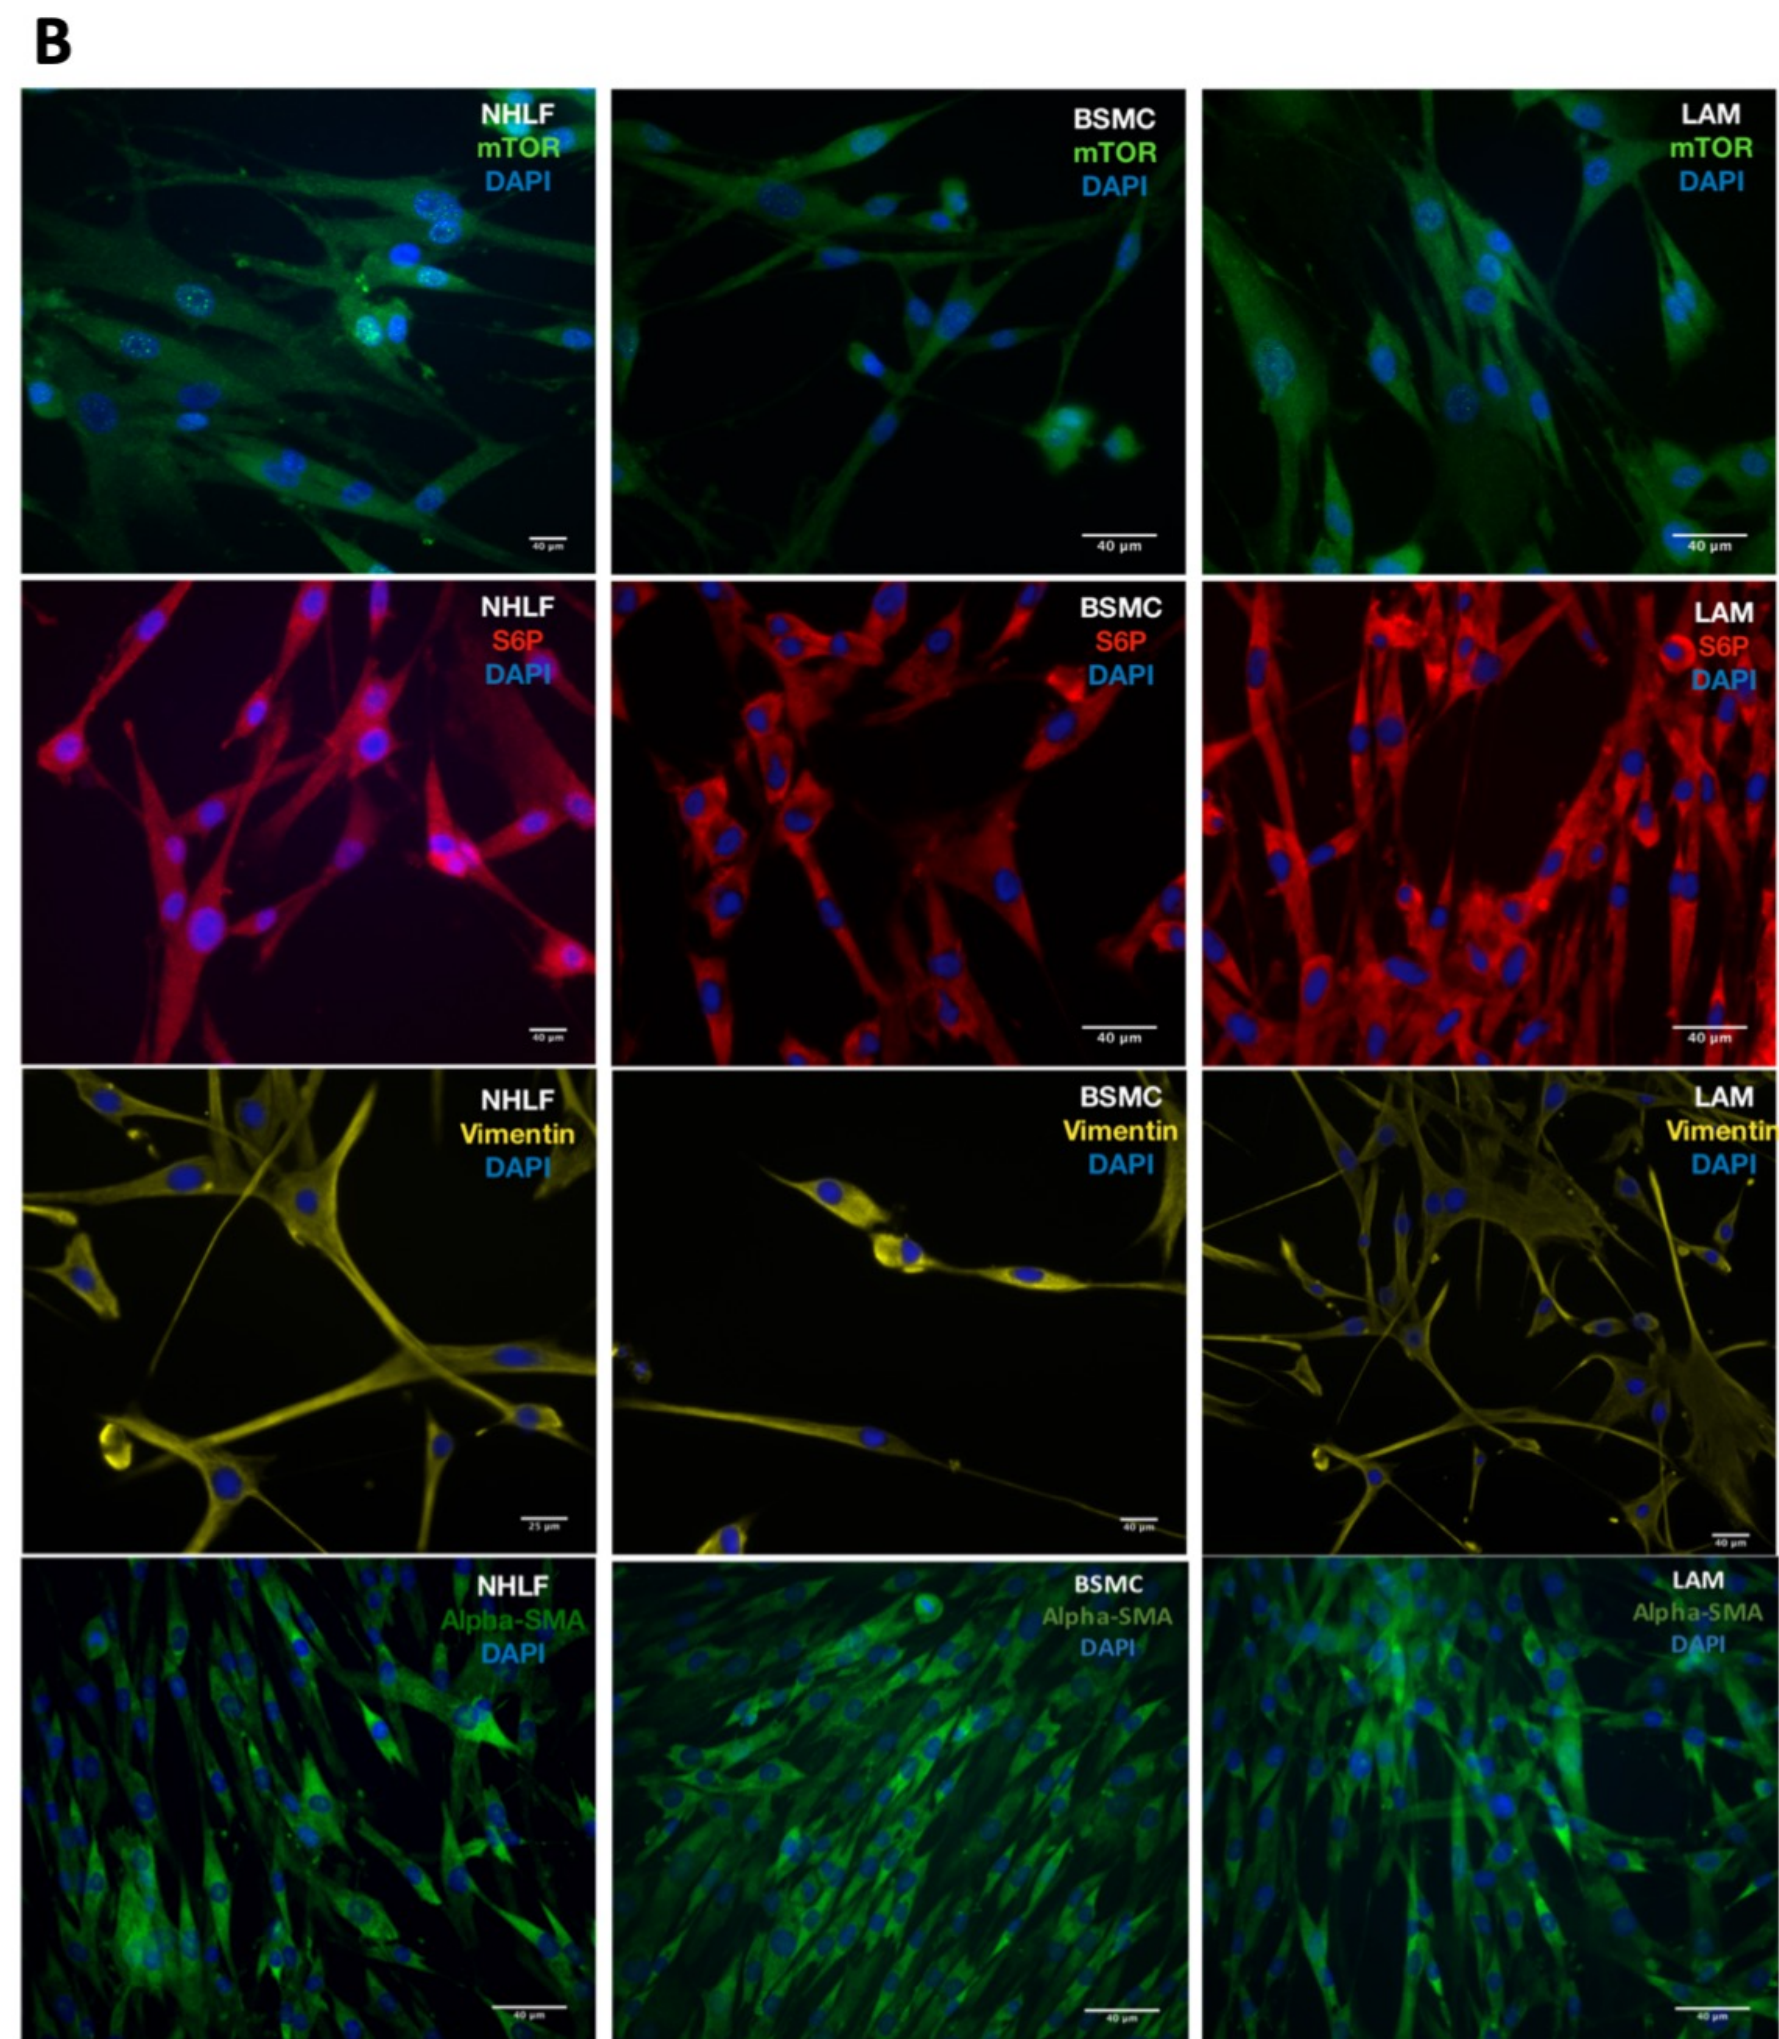

**S. Figure 1. Characterizations of LAM cell lines derived from primary LAM tissues. A)** loss of TSC2 in LAM cells. qRT-PCR analysis of TSC2 in LAM (n=4), NHLF (n=2) and SMC (n=2), data are presented as mean log RQ  $\pm$  technical error. **B)** SMC controls (n=2), NHLF (n=2) and patient derived LAM cell lines (n=4) were stained for PS6, vimentin, mTOR and ASMA (ASMA and mTOR green, vimentin yellow, PS6 red, DAPI blue, magnification 40x, size-bar 40  $\mu$ m). **C)** Quantification of fluorescent density. Data are presented as integrated density % compared to SMC $\pm$ SEM, significant changes are marked as  $\star$  (P<0.05).







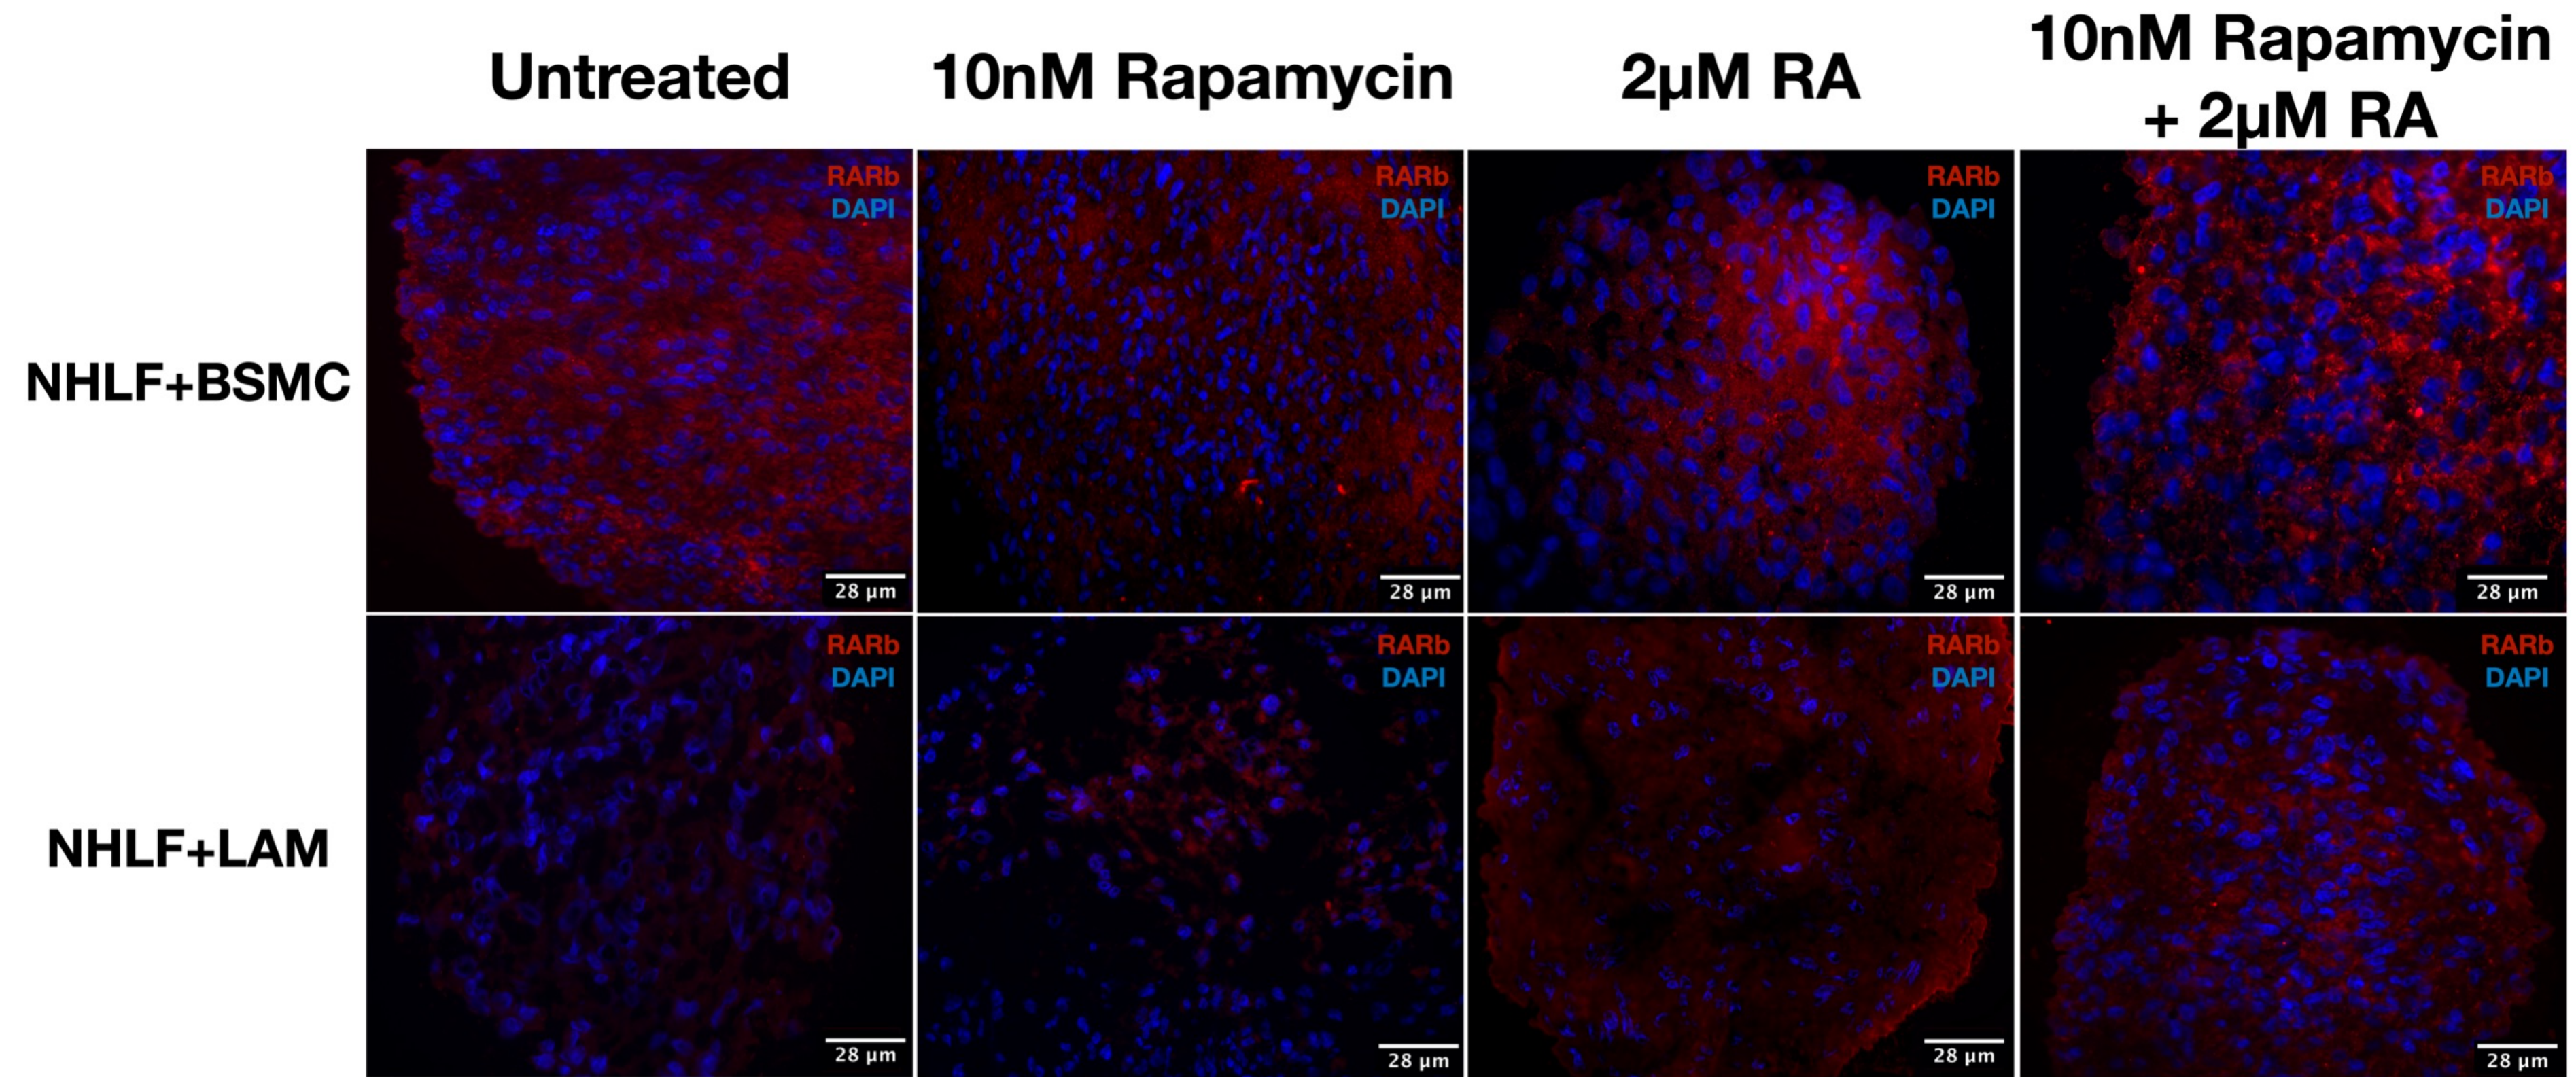

**S. Figure 3. RA rescues RA expression in LAM 3D model.** RAR $\beta$  expression in 3D co-cultures without NHLF-GFP signal (Figure 4E) after 10 nM rapamycin and/or 2  $\mu$ M RA treatment for 24 h. RAR $\beta$  is red and the nucleus is stained by DAPI (blue). Magnification 40x, size-bar 28  $\mu$ m.
